# Supplementary material
Source: PubMed Central journal article supplement (PMC3803136)
Supplement: supp_13-12490_IOVS-13-12490-s01.pdf [file supp_13-12490_IOVS-13-12490-s01.pdf]

**Supplementary Table A:** Associations with optic disc area – results from univariable regressions. P-values <0.01 are in bold. BMI – body mass index; DBP – diastolic blood pressure; IOP – intraocular pressure; Ref – reference level; SBP – systolic blood pressure.

|                                       | $\beta$ | 95% CI           | p-value          |
|---------------------------------------|---------|------------------|------------------|
| <b>Age</b> (per decade)               | -0.021  | (-0.034, -0.007) | <b>0.002</b>     |
| <b>Sex</b>                            |         |                  |                  |
| Male                                  | Ref     |                  |                  |
| Female                                | -0.066  | (-0.085, -0.046) | <b>&lt;0.001</b> |
| <b>Height</b> (per 10cm)              | 0.046   | ( 0.035, 0.057)  | <b>&lt;0.001</b> |
| <b>BMI</b> (per 5 kg/m <sup>2</sup> ) | 0.006   | (-0.005, 0.018)  | 0.30             |
| <b>SBP</b> (per 10mmHg)               | 0.000   | (-0.006, 0.006)  | 0.94             |
| <b>DBP</b> (per 10mmHg)               | 0.018   | ( 0.008, 0.029)  | <b>0.001</b>     |
| <b>Social class</b>                   |         |                  |                  |
| Professional                          | Ref     |                  |                  |
| Managerial/technical                  | -0.004  | (-0.040, 0.033)  | 0.85             |
| Skilled non-manual                    | -0.020  | (-0.061, 0.022)  | 0.36             |
| Skilled manual                        | -0.004  | (-0.043, 0.036)  | 0.86             |
| Partly-skilled                        | -0.022  | (-0.067, 0.022)  | 0.33             |
| Unskilled                             | -0.034  | (-0.111, 0.042)  | 0.38             |
| <b>Education level</b>                |         |                  |                  |
| Degree                                | Ref     |                  |                  |
| A level                               | -0.002  | (-0.030, 0.026)  | 0.90             |
| O Level                               | -0.027  | (-0.063, 0.010)  | 0.15             |
| Less than O level                     | -0.026  | (-0.057, 0.005)  | 0.10             |
| <b>Alcohol intake</b>                 |         |                  |                  |
| No intake                             | Ref     |                  |                  |
| >0 <7 units/wk                        | -0.005  | (-0.033, 0.023)  | 0.73             |
| >=7 <14 units/wk                      | 0.034   | ( 0.005, 0.063)  | 0.021            |
| >=14 <21 units/wk                     | 0.043   | ( 0.008, 0.078)  | 0.017            |
| >=21 units/wk                         | 0.021   | (-0.009, 0.051)  | 0.17             |
| <b>Smoking status</b>                 |         |                  |                  |
| Never                                 | Ref     |                  |                  |
| Ever                                  | 0.016   | (-0.004, 0.035)  | 0.12             |
| <b>Axial length</b> (mm)              | 0.046   | ( 0.037, 0.054)  | <b>&lt;0.001</b> |
| <b>IOP</b> (mmHg)                     | 0.003   | ( 0.001, 0.005)  | <b>0.004</b>     |
| <b>Lens status</b>                    |         |                  |                  |
| Phakic                                | Ref     |                  |                  |
| Pseudophakic                          | -0.028  | (-0.061, 0.005)  | 0.09             |
