# Supplementary material
Source: PubMed Central journal article supplement (PMC3803136)
Supplement: supp_13-12490_IOVS-13-12490-s02.pdf [file supp_13-12490_IOVS-13-12490-s02.pdf]

**Supplementary Table B:** Correlation matrix for HRT variables. CLM = contour line modulation; RNFL = retinal nerve fibre layer.

|                                                   | Cup area | Rim area | Cup-to-disc area ratio | Rim-to-disc area ratio | Cup volume | Rim volume | Mean cup depth | Maximum cup depth | Height variation contour | Cup shape measure | Mean RNFL thickness | RNFL cross-sectional area | Horizontal cup-to-disc ratio | Vertical cup-to-disc ratio | CLM temporal-superior | CLM temporal-inferior | Linear cup-to-disc ratio |      |
|---------------------------------------------------|----------|----------|------------------------|------------------------|------------|------------|----------------|-------------------|--------------------------|-------------------|---------------------|---------------------------|------------------------------|----------------------------|-----------------------|-----------------------|--------------------------|------|
| <b>Cup area (mm<sup>2</sup>)</b>                  | 1.00     |          |                        |                        |            |            |                |                   |                          |                   |                     |                           |                              |                            |                       |                       |                          |      |
| <b>Rim area (mm<sup>2</sup>)</b>                  | -0.23    | 1.00     |                        |                        |            |            |                |                   |                          |                   |                     |                           |                              |                            |                       |                       |                          |      |
| <b>Cup-to-disc area ratio</b>                     | 0.94     | -0.45    | 1.00                   |                        |            |            |                |                   |                          |                   |                     |                           |                              |                            |                       |                       |                          |      |
| <b>Rim-to-disc area ratio</b>                     | -0.94    | 0.45     | -1.00                  | 1.00                   |            |            |                |                   |                          |                   |                     |                           |                              |                            |                       |                       |                          |      |
| <b>Cup volume (mm<sup>3</sup>)</b>                | 0.89     | -0.26    | 0.85                   | -0.85                  | 1.00       |            |                |                   |                          |                   |                     |                           |                              |                            |                       |                       |                          |      |
| <b>Rim volume (mm<sup>3</sup>)</b>                | -0.42    | 0.74     | -0.56                  | 0.56                   | -0.38      | 1.00       |                |                   |                          |                   |                     |                           |                              |                            |                       |                       |                          |      |
| <b>Mean cup depth (mm)</b>                        | 0.77     | -0.35    | 0.82                   | -0.82                  | 0.84       | -0.27      | 1.00           |                   |                          |                   |                     |                           |                              |                            |                       |                       |                          |      |
| <b>Maximum cup depth (mm)</b>                     | 0.65     | -0.31    | 0.72                   | -0.72                  | 0.73       | -0.22      | 0.93           | 1.00              |                          |                   |                     |                           |                              |                            |                       |                       |                          |      |
| <b>Height variation contour (mm)</b>              | -0.09    | 0.06     | -0.10                  | 0.10                   | -0.08      | 0.48       | 0.13           | 0.17              | 1.00                     |                   |                     |                           |                              |                            |                       |                       |                          |      |
| <b>Cup shape measure</b>                          | 0.49     | -0.23    | 0.49                   | -0.49                  | 0.40       | -0.22      | 0.39           | 0.08              | -0.02                    | 1.00              |                     |                           |                              |                            |                       |                       |                          |      |
| <b>Mean RNFL thickness (mm)</b>                   | -0.32    | 0.11     | -0.31                  | 0.31                   | -0.26      | 0.61       | 0.09           | 0.16              | 0.63                     | -0.13             | 1.00                |                           |                              |                            |                       |                       |                          |      |
| <b>RNFL cross-sectional area (mm<sup>2</sup>)</b> | -0.12    | 0.33     | -0.18                  | 0.18                   | -0.09      | 0.71       | 0.21           | 0.26              | 0.60                     | -0.05             | 0.93                | 1.00                      |                              |                            |                       |                       |                          |      |
| <b>Horizontal cup-to-disc ratio</b>               | 0.82     | -0.39    | 0.88                   | -0.88                  | 0.72       | -0.50      | 0.77           | 0.73              | -0.07                    | 0.34              | -0.23               | -0.11                     | 1.00                         |                            |                       |                       |                          |      |
| <b>Vertical cup-to-disc ratio</b>                 | 0.84     | -0.37    | 0.90                   | -0.90                  | 0.72       | -0.49      | 0.78           | 0.71              | -0.09                    | 0.41              | -0.24               | -0.11                     | 0.80                         | 1.00                       |                       |                       |                          |      |
| <b>CLM temporal-superior (mm)</b>                 | -0.14    | 0.11     | -0.15                  | 0.15                   | -0.09      | 0.47       | 0.16           | 0.22              | 0.51                     | -0.09             | 0.74                | 0.73                      | -0.07                        | -0.13                      | 1.00                  |                       |                          |      |
| <b>CLM temporal-inferior (mm)</b>                 | -0.21    | 0.14     | -0.22                  | 0.22                   | -0.14      | 0.47       | 0.07           | 0.12              | 0.46                     | -0.12             | 0.66                | 0.64                      | -0.13                        | -0.20                      | 0.32                  | 1.00                  |                          |      |
| <b>Linear cup-to-disc ratio</b>                   | 0.88     | -0.44    | 0.96                   | -0.96                  | 0.75       | -0.55      | 0.83           | 0.77              | -0.08                    | 0.41              | -0.25               | -0.12                     | 0.91                         | 0.89                       | -0.10                 | -0.18                 | 1.00                     |      |
| <b>Disc area (mm<sup>2</sup>)</b>                 | 0.63     | 0.61     | 0.40                   | -0.40                  | 0.51       | 0.25       | 0.34           | 0.28              | -0.03                    | 0.22              | -0.18               | 0.17                      | 0.35                         | 0.38                       | -0.03                 | -0.05                 | 0.36                     | 1.00 |
