# Supplementary material
Source: PubMed Central journal article supplement (PMC3803136)
Supplement: supp_13-12490_IOVS-13-12490-s03.pdf [file supp_13-12490_IOVS-13-12490-s03.pdf]

**Supplementary Table C:** Mean, standard deviation (SD), minimum (min) and maximum (max) values for the 3 component scores: cup, RNFL (retinal nerve fibre layer), rim.

|             | <b>Mean</b> | <b>SD</b> | <b>Min</b> | <b>Max</b> |
|-------------|-------------|-----------|------------|------------|
| <b>Cup</b>  | 0.00        | 2.82      | -5.53      | 10.90      |
| <b>RNFL</b> | 0.00        | 2.01      | -8.22      | 10.22      |
| <b>Rim</b>  | 0.00        | 1.30      | -4.29      | 7.99       |
