# Supplementary material
Source: PubMed Central journal article supplement (PMC3803136)
Supplement: supp_13-12490_IOVS-13-12490-s04.pdf [file supp_13-12490_IOVS-13-12490-s04.pdf]

**Supplementary Table D:** Correlation matrix for the 3 component scores: cup, RNFL (retinal nerve fibre layer), rim.

|             | <b>Cup</b> | <b>RNFL</b> | <b>Rim</b> |
|-------------|------------|-------------|------------|
| <b>Cup</b>  | 1.00       |             |            |
| <b>RNFL</b> | -0.13      | 1.00        |            |
| <b>Rim</b>  | -0.44      | 0.31        | 1.00       |
