# Supplementary material
Source: PubMed Central journal article supplement (PMC3803136)
Supplement: supp_13-12490_IOVS-13-12490-s05.pdf [file supp_13-12490_IOVS-13-12490-s05.pdf]

**Supplementary Table E:** Crude associations with each of the 3 component scores adjusted for optic disc area only. P-values <0.01 are in bold. BMI – body mass index; DBP – diastolic blood pressure; IOP – intraocular pressure; Ref – reference level; RNFL – retinal nerve fibre layer; SBP – systolic blood pressure.

|                                       | Cup component |                  |                  | RNFL component |                  |                  | Rim component |                  |                  |
|---------------------------------------|---------------|------------------|------------------|----------------|------------------|------------------|---------------|------------------|------------------|
|                                       | $\beta$       | 95% CI           | p-value          | $\beta$        | 95% CI           | p-value          | $\beta$       | 95% CI           | p-value          |
| <b>Age</b> (per decade)               | 0.136         | (0.057, 0.214)   | <b>0.001</b>     | -0.453         | (-0.511, -0.395) | <b>&lt;0.001</b> | -0.080        | (-0.113, -0.046) | <b>&lt;0.001</b> |
| <b>Sex</b>                            |               |                  |                  |                |                  |                  |               |                  |                  |
| Male                                  | Ref           |                  |                  | Ref            |                  |                  | Ref           |                  |                  |
| Female                                | -0.158        | (-0.277, -0.040) | <b>0.009</b>     | 0.244          | (0.156, 0.333)   | <b>&lt;0.001</b> | 0.090         | (0.040, 0.140)   | <b>&lt;0.001</b> |
| <b>Height</b> (per 10cm)              | 0.103         | (0.037, 0.169)   | <b>0.002</b>     | -0.013         | (-0.062, 0.036)  | 0.61             | -0.049        | (-0.077, -0.021) | <b>0.001</b>     |
| <b>BMI</b> (per 5 kg/m <sup>2</sup> ) | -0.129        | (-0.198, -0.061) | <b>&lt;0.001</b> | -0.023         | (-0.074, 0.029)  | 0.39             | 0.047         | (0.018, 0.076)   | <b>0.001</b>     |
| <b>SBP</b> (per 10mmHg)               | -0.005        | (-0.040, 0.031)  | 0.79             | -0.038         | (-0.065, -0.012) | <b>0.005</b>     | -0.001        | (-0.016, 0.014)  | 0.85             |
| <b>DBP</b> (per 10mmHg)               | 0.005         | (-0.058, 0.068)  | 0.87             | -0.004         | (-0.051, 0.043)  | 0.86             | -0.008        | (-0.034, 0.019)  | 0.57             |
| <b>Social class</b>                   |               |                  |                  |                |                  |                  |               |                  |                  |
| Professional                          | Ref           |                  |                  | Ref            |                  |                  | Ref           |                  |                  |
| Managerial/technical                  | -0.044        | (-0.261, 0.172)  | 0.69             | 0.091          | (-0.071, 0.253)  | 0.27             | 0.019         | (-0.072, 0.111)  | 0.68             |
| Skilled non-manual                    | -0.158        | (-0.404, 0.089)  | 0.21             | 0.030          | (-0.155, 0.214)  | 0.75             | 0.076         | (-0.028, 0.181)  | 0.15             |
| Skilled manual                        | 0.062         | (-0.172, 0.296)  | 0.60             | 0.025          | (-0.150, 0.200)  | 0.78             | -0.018        | (-0.117, 0.081)  | 0.72             |
| Partly-skilled                        | -0.088        | (-0.350, 0.175)  | 0.51             | -0.020         | (-0.216, 0.176)  | 0.84             | 0.035         | (-0.076, 0.146)  | 0.54             |
| Unskilled                             | 0.108         | (-0.344, 0.561)  | 0.64             | -0.356         | (-0.694, -0.017) | 0.039            | -0.062        | (-0.253, 0.130)  | 0.53             |
| <b>Education level</b>                |               |                  |                  |                |                  |                  |               |                  |                  |
| Degree                                | Ref           |                  |                  | Ref            |                  |                  | Ref           |                  |                  |
| A level                               | 0.107         | (-0.058, 0.272)  | 0.20             | -0.242         | (-0.364, -0.119) | <b>&lt;0.001</b> | -0.078        | (-0.148, -0.008) | 0.028            |
| O Level                               | -0.080        | (-0.297, 0.138)  | 0.47             | -0.018         | (-0.179, 0.144)  | 0.83             | 0.047         | (-0.045, 0.139)  | 0.32             |
| Less than O level                     | 0.086         | (-0.096, 0.268)  | 0.35             | -0.315         | (-0.451, -0.180) | <b>&lt;0.001</b> | -0.048        | (-0.124, 0.029)  | 0.23             |
| <b>Alcohol intake</b>                 |               |                  |                  |                |                  |                  |               |                  |                  |
| No intake                             | Ref           |                  |                  | Ref            |                  |                  | Ref           |                  |                  |
| <7 units/wk                           | -0.073        | (-0.238, 0.092)  | 0.39             | -0.042         | (-0.165, 0.081)  | 0.51             | 0.015         | (-0.055, 0.085)  | 0.67             |
| >=7 <14 units/wk                      | -0.008        | (-0.180, 0.164)  | 0.93             | -0.031         | (-0.159, 0.098)  | 0.64             | -0.005        | (-0.078, 0.068)  | 0.89             |
| >=14 <21 units/wk                     | -0.054        | (-0.263, 0.154)  | 0.61             | -0.112         | (-0.268, 0.044)  | 0.16             | -0.001        | (-0.089, 0.087)  | 0.98             |
| >=21 units/wk                         | -0.024        | (-0.201, 0.154)  | 0.79             | 0.054          | (-0.078, 0.187)  | 0.42             | 0.004         | (-0.071, 0.079)  | 0.91             |
| <b>Smoking status</b>                 |               |                  |                  |                |                  |                  |               |                  |                  |
| Never                                 | Ref           |                  |                  | Ref            |                  |                  | Ref           |                  |                  |
| Ever                                  | 0.033         | (-0.085, 0.150)  | 0.59             | -0.009         | (-0.097, 0.079)  | 0.84             | -0.020        | (-0.070, 0.030)  | 0.43             |
| <b>Axial length</b> (mm)              | 0.039         | (-0.010, 0.088)  | 0.12             | -0.193         | (-0.230, -0.155) | <b>&lt;0.001</b> | -0.025        | (-0.046, -0.004) | 0.020            |
| <b>IOP</b> (mmHg)                     | 0.046         | (0.033, 0.058)   | <b>&lt;0.001</b> | -0.006         | (-0.017, 0.005)  | 0.28             | -0.019        | (-0.024, -0.013) | <b>&lt;0.001</b> |
| <b>Lens status</b>                    |               |                  |                  |                |                  |                  |               |                  |                  |
| Phakic                                | Ref           |                  |                  | Ref            |                  |                  | Ref           |                  |                  |
| Pseudophakic                          | 0.250         | (0.056, 0.443)   | 0.012            | -0.675         | (-0.832, -0.519) | <b>&lt;0.001</b> | -0.138        | (-0.223, -0.053) | <b>0.001</b>     |
