# Supplementary material
Source: PubMed Central journal article supplement (PMC3803136)
Supplement: supp_13-12490_IOVS-13-12490-s06.pdf [file supp_13-12490_IOVS-13-12490-s06.pdf]

**Supplementary Table F:** Multivariable associations in participants with no history of ocular hypotensive medication or glaucoma surgery. Results are from 3 multivariable linear regression models with the HRT variable as dependent variable, and all explanatory variables presented included together in each model. P-values <0.01 are in bold. BMI – body mass index; IOP – intraocular pressure; Ref – reference level; SBP – systolic blood pressure.

|                                       | Linear cup-to-disc ratio |                  |                  | Mean RNFL thickness (mm) |                  |                  | Rim area (mm <sup>2</sup> ) |                  |                  |
|---------------------------------------|--------------------------|------------------|------------------|--------------------------|------------------|------------------|-----------------------------|------------------|------------------|
|                                       | $\beta$                  | 95% CI           | P-value          | $\beta$                  | 95% CI           | P-value          | $\beta$                     | 95% CI           | P-value          |
| <b>Age</b> (per decade)               | 0.007                    | (0.001, 0.013)   | 0.017            | -0.014                   | (-0.016, -0.012) | <b>&lt;0.001</b> | -0.016                      | (-0.026, -0.007) | <b>&lt;0.001</b> |
| <b>Sex</b>                            |                          |                  |                  |                          |                  |                  |                             |                  |                  |
| Male                                  | Ref                      |                  |                  | Ref                      |                  |                  | Ref                         |                  |                  |
| Female                                | 0.004                    | (-0.008, 0.015)  | 0.54             | 0.006                    | (0.002, 0.011)   | <b>0.004</b>     | -0.001                      | (-0.019, 0.017)  | 0.93             |
| <b>Height</b> (per 10cm)              | 0.009                    | (0.003, 0.015)   | <b>0.007</b>     | 0.002                    | (0.000, 0.005)   | 0.042            | -0.011                      | (-0.021, -0.000) | 0.042            |
| <b>BMI</b> (per 5 kg/m <sup>2</sup> ) | -0.008                   | (-0.013, -0.004) | <b>&lt;0.001</b> | 0.001                    | (-0.001, 0.002)  | 0.53             | 0.014                       | (0.006, 0.021)   | <b>&lt;0.001</b> |
| <b>SBP</b> (per 10mmHg)               | -0.001                   | (-0.003, 0.002)  | 0.52             | 0.000                    | (-0.001, 0.001)  | 0.58             | 0.003                       | (-0.001, 0.007)  | 0.15             |
| <b>Education level</b>                |                          |                  |                  |                          |                  |                  |                             |                  |                  |
| Degree                                | Ref                      |                  |                  | Ref                      |                  |                  | Ref                         |                  |                  |
| A level                               | 0.009                    | (-0.002, 0.020)  | 0.11             | -0.008                   | (-0.012, -0.003) | <b>&lt;0.001</b> | -0.014                      | (-0.031, 0.003)  | 0.12             |
| O Level                               | -0.003                   | (-0.017, 0.012)  | 0.71             | -0.001                   | (-0.007, 0.004)  | 0.66             | 0.004                       | (-0.019, 0.026)  | 0.75             |
| Less than O level                     | 0.009                    | (-0.003, 0.022)  | 0.15             | -0.009                   | (-0.014, -0.005) | <b>&lt;0.001</b> | -0.015                      | (-0.035, 0.004)  | 0.13             |
| <b>Axial length</b> (mm)              | 0.002                    | (-0.002, 0.005)  | 0.36             | -0.006                   | (-0.008, -0.005) | <b>&lt;0.001</b> | -0.003                      | (-0.009, 0.002)  | 0.22             |
| <b>IOP</b> (mmHg)                     | 0.003                    | (0.002, 0.004)   | <b>&lt;0.001</b> | 0.000                    | (-0.001, 0.000)  | 0.16             | -0.005                      | (-0.007, -0.004) | <b>&lt;0.001</b> |
| <b>Lens status</b>                    |                          |                  |                  |                          |                  |                  |                             |                  |                  |
| Phakic                                | Ref                      |                  |                  | Ref                      |                  |                  | Ref                         |                  |                  |
| Pseudophakic                          | 0.009                    | (-0.005, 0.023)  | 0.21             | -0.008                   | (-0.014, -0.003) | <b>0.003</b>     | -0.014                      | (-0.037, 0.008)  | 0.21             |
