# Supplementary material
Source: PubMed Central journal article supplement (PMC3803136)

**Supplementary Figure A:** A graphical matrix of scatter plots examining the correlation structure of HRT parameters.

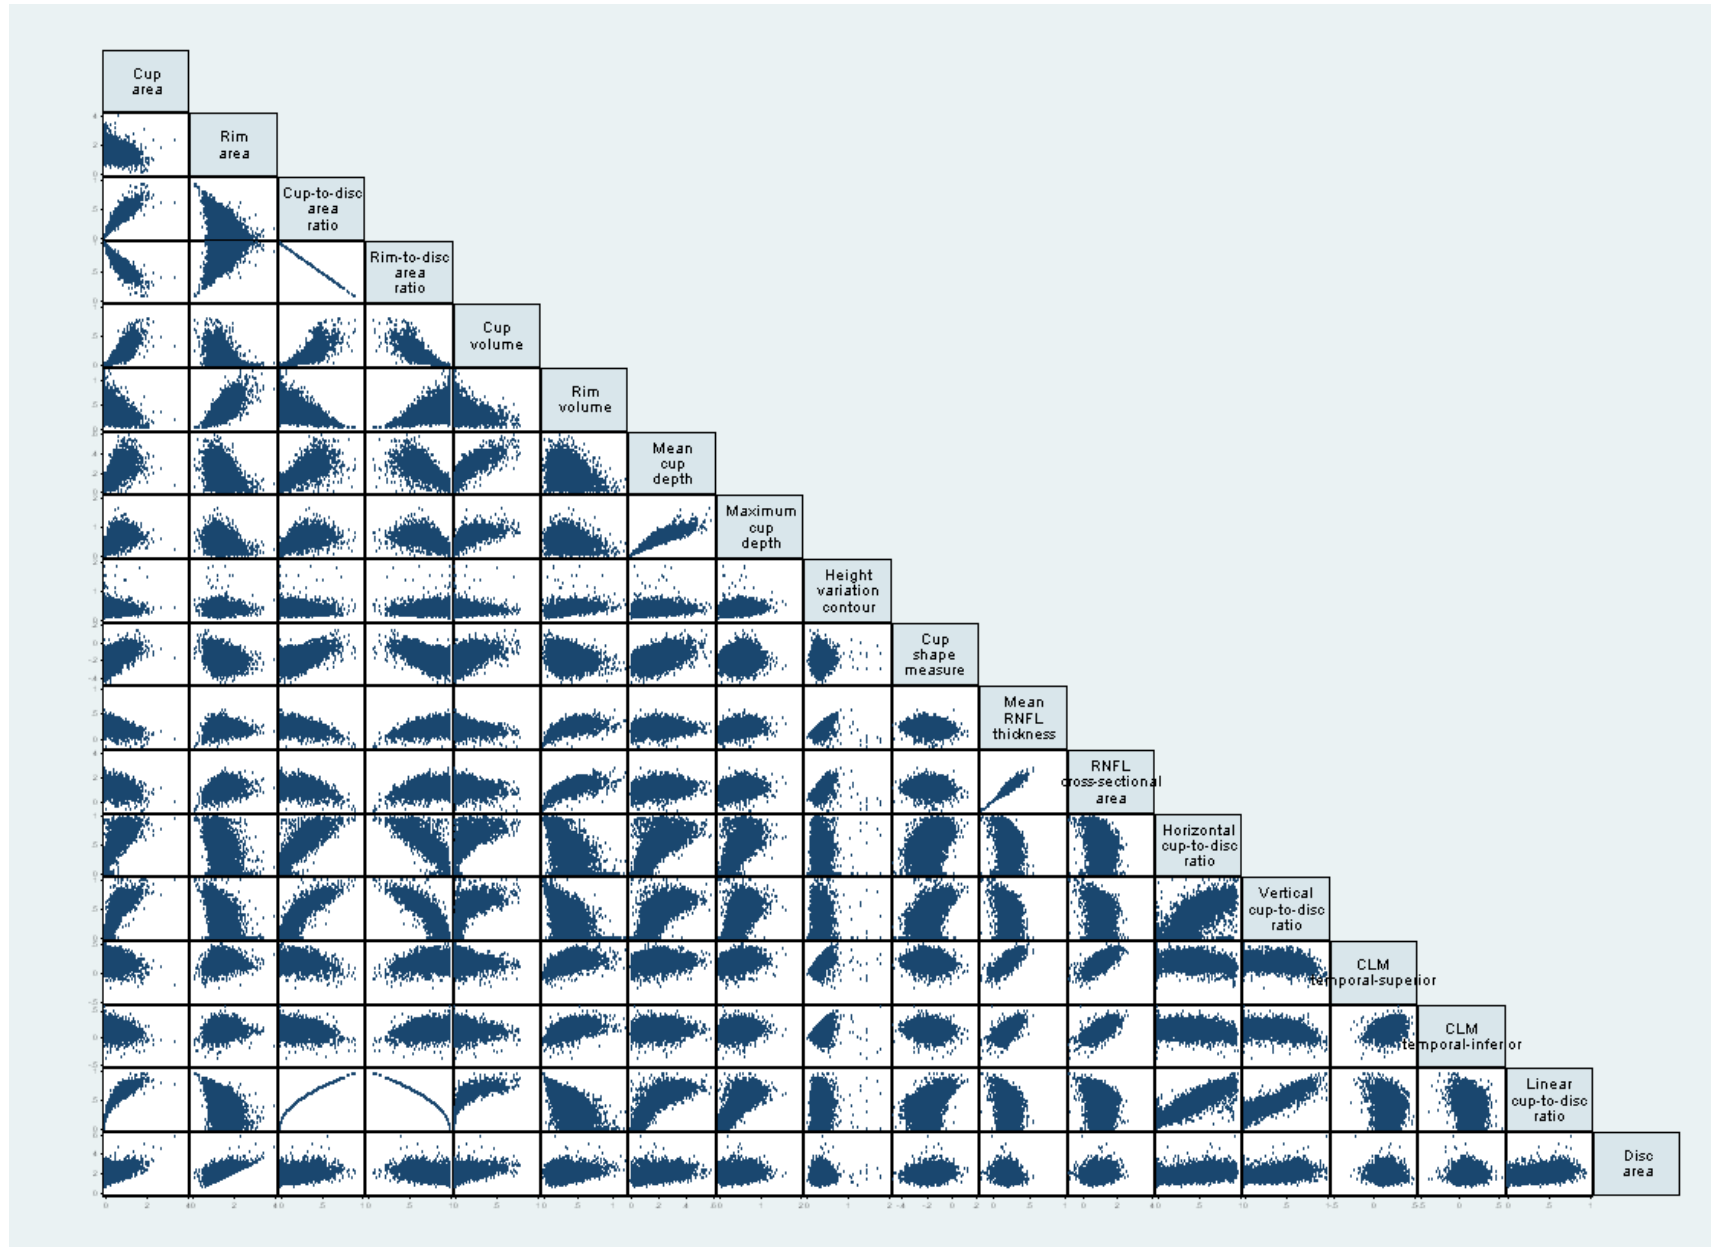

Supplement: supp_13-12490_IOVS-13-12490-s07.pdf [file supp_13-12490_IOVS-13-12490-s07.pdf]
